# Supplementary material for: Aspergillus fumigatus Can Display Persistence to the Fungicidal Drug Voriconazole
Source: Microbiol Spectr. 2023 Mar 13;11(2):e04770-22. doi: 10.1128/spectrum.04770-22 (PMC10100717; doi:10.1128/spectrum.04770-22)

## SUPPLEMENTARY FIGURE LEGENDS

### Fig. S1.

Disc diffusion screening of the PD-47 collection of isolates (Table S1 at <https://doi.org/10.5281/zenodo.7533742>) on RPMI plate with 10  $\mu$ L of 0.8 mg/mL voriconazole. Only 5 isolates could grow colonies in the inhibition halos. Upon re-inoculation of the colonies of the halo (grown in the absence or presence of voriconazole, as detailed), PD-254, PD-256 and PD-266 covered the entire plate. As explained in the text those strains were classified as resistant or potentially heteroresistant. In contrast, PD-9 and PD-104 CoHs showed upon re-inoculation the same level of growth as the original isolates. These strains were classified as persisters.

### Fig. S2.

**A)** The standardized E-test strip provided the same results as disc diffusion assays: the persister isolates PD-9 and PD-104 developed colonies in the halo of inhibition, and the non-persister isolates ATCC and PD-60 did not. E-test was performed according to Biomerieux instructions and repeated three independent times. **B)** Two CoHs from PD-9 and PD-104 were picked and sequentially passaged on PDA without drug. Every second passage the spores were inoculated in a new disc diffusion assay to check the level of resistance (diameter of the halo) and persistence (appearance of colonies in the halo). After 7 passages both CoHs from both isolates showed the same level of persistence, demonstrating that this phenotype is stable.

### Fig. S3.

Disc diffusion screening of the PD-47 collection of isolates. Three days after inoculation, the disc containing voriconazole (10  $\mu$ L of 0.8 mg/mL) was substituted for another one containing *Aspergillus* minimal medium. A few colonies were able to grow colonies in the halos after the switch, suggesting that a few conidia remain viable. Only three strains PD-9 and PD-104 and PD-259 grew colonies before the switch. Of those, only PD-9 and PD-104 grew additional colonies after the switch.

### Fig. S4.

Independent repetitions of the experiment shown in Figure 1B. The wells of 1X, 2X and 3X MIC of voriconazole for the isolates ATCC, PD-9, PD-60 and PD-104 were imaged under the microscope. The non-persister isolates ATCC and PD-60 only displayed limited microscopic growth at 1X MIC. In contrast, the persister isolates PD-9 and PD-104 displayed microscopic growth at 1X, 2X and 3X supra-MIC concentrations. Scale bar= 132.5  $\mu$ m.

### Fig. S5

**A)** Photos taken at the site of ATCC conidia inoculation on an RPMI agar plate showed that germlings are visible after 8h of incubation at 37  $^{\circ}$ C, and short hyphae have developed after 16 hours of incubation. Agar was cut out and inverted on a cover slip containing a drop of PBS. Images were taken on a Leica SP8 inverted microscope. Images were processed using Fiji [129]. **B)** There was no difference in the germination rate or ratio of the isolates ATCC, PD-9, PD-60 and PD-104. **C)** Measurement of growth rate of persister and non-persister isolates on solid RPMI showed that the strains have no difference in basal growth. **D)** Measurement of growth rate of persister and non-persister isolates on liquid RPMI showed that the strains have no difference in basal growth. **E)** Quantification of CoHs formed on rich media under hypoxia.

### Fig. S6.

Disc diffusion screening of the PD-47 collection of isolates (Table S1 at <https://doi.org/10.5281/zenodo.7533742>) on RPMI plate with 10  $\mu$ L of 3.2 mg/mL itraconazole. Isolates RC (as expected) and PD-256 did not form an inhibition halo, reflecting that they are resistant to itraconazole. Isolates PD-104 and PD-266 could grow colonies in the halo. PD-104 formed upon re-inoculation a halo of the same size and similar number of CoHs as the original isolate, suggesting that it is persistence to itraconazole. The isolate PD-266 nearly covered the inhibition halo upon reinoculation, suggesting an increment in its MIC and therefore that it is potentially heteroresistant to itraconazole, as previously shown for voriconazole.

**Fig. S7.**

**A)** MICs of itraconazole and isavuconazole for the isolates ATCC, PD-9, PD-60 and PD-104, as calculated by broth dilution assay. **B)** The isolates PD-9 and PD-104 displayed some microscopic growth at 2X the MIC concentration for both azoles, whilst the isolates ATCC and PD-60 did not grow at all and only resting conidia could be found. Scale bar= 132.5  $\mu\text{m}$ . **C)** The entire content of the wells containing the highest concentration (8  $\mu\text{g/mL}$ ) of each azole were inoculated on PDA plates and incubated for 48 h at 37 °C. A noticeable ratio of viable conidia were detected for the isolates PD-9 and PD-104. Each experiment was repeated twice independently. The graph represents the means and SD.

**Fig. S8.**

**A)** A nylon membrane was placed on the RPMI plate. Conidia were inoculated on the membrane and the disc containing voriconazole (10  $\mu\text{L}$  of 0.8 mg/mL) was also put on it. As in a normal disc diffusion assay, an inhibition halo was formed, inside of which the persister strain PD-104 was able to grow small colonies, but the non-persister strain A1160 was not. **B)** RT-PCR of six selected DEGs detected in the transcriptomic analysis confirmed their differential expression, validating the RNA-seq. Additionally, the expression of the *adg3* gene was confirmed to be elevated in persister growth. The graphs display the mean and SD FC of 2 biological replicates (with three technical replicates). No Drug means sample obtained from a plate without voriconazole disc, Low Drug means sample collected at mid-distance of the inhibition halo and Persister means samples taken from colonies inside the inhibition halo (as shown in Fig. 5).

**Fig. S9.**

**A)** A network of interacting proteins was detected by STRING ( $p=1.84\text{e-}08$ ) when using as query the 64 genes upregulated only in persistence in PD-104. Seventeen proteins related with metabolism formed a node, formed a node suggesting a specific metabolic response during persister growth. The predicted function of these genes is shown in the figure. **B)** Within the 18 genes that were upregulated in all comparisons, a tight node of 6 interacting proteins, related with ergosterol production, was detected by STRING ( $p<1.0\text{e-}16$ ). The predicted function of these genes is shown in Table 2.

**Fig. S10.**

**A)** Representative disc diffusion plates carried out with the collection of isolates from the TAU medical centre. Six isolates were able to form CoHs, which did upon reinoculation form halos of the same size (MIC did not increase) and create a similar number of CoHs. **B)** Survival curves of larvae infected with  $10^4$  or  $5\times 10^4$  conidia of the isolates ATCC, PD-60 (non-persisters), PD-9 or PD-104 (persisters). All strains killed larvae at a similar rate, demonstrating that they are equally virulent. For  $10^4$ , three independent experiments were done with 15-20 larvae/isolate in each. For  $5\times 10^4$ , two independent experiments were done with 10-15 larvae/isolate in each. **C)** Resazurin was added to the broth dilution RPMI plate at a 0.002% (w/v) final concentration. The plate was incubated for 24 hours in a Tecan Infinity M-Plex plate reader and fluorescence was measured every 30 minutes with an excitation wavelength of 544 nm and reading emission at 590 nm using the i-control 2.0 software. The read for each well at each time point was normalized as follows: (read well time X – read 8  $\mu\text{g/mL}$  voriconazole time X)/read well at time 0. The time point with the best dynamic range of values in the 1X, 2X and 3X MIC was found to be 20 hours, which was selected to determine the metabolic activity. A value of 0.1 was assigned as background and values above 1 were detected in sub-MIC (macroscopic growth). At 1X MIC, a slight metabolic activity could be detected for both the non-persister ATCC and the persister isolates PD-9 and PD-104. At 2X and 3X the MIC, slight metabolic activity could only be detected for the persister isolates. The experiment was performed once with two biological replicates, the graph represents the means and SEM.

Fig. S1

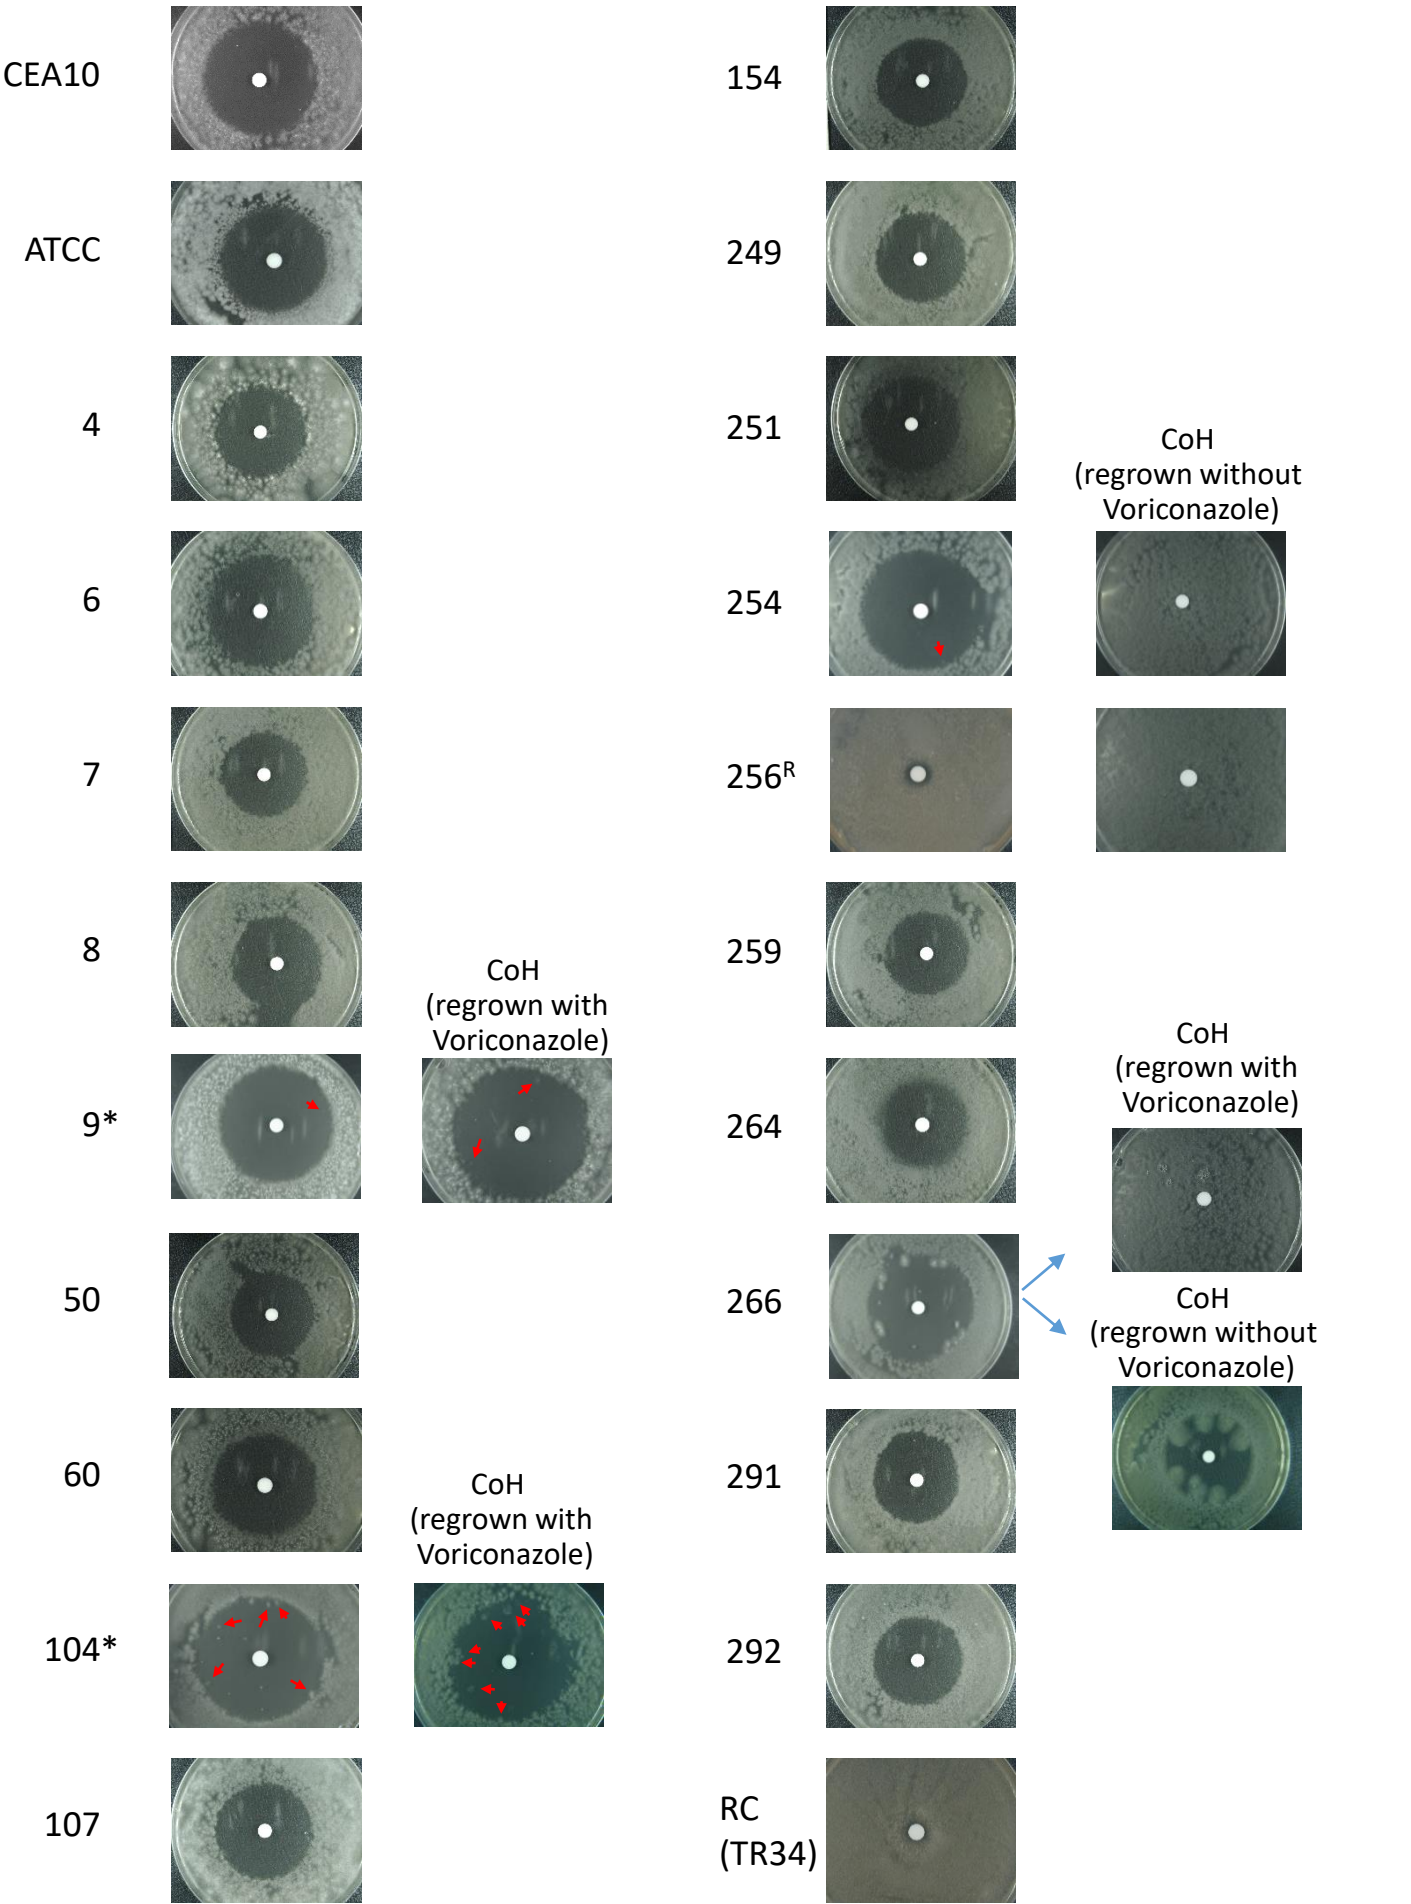

Fig. S2

A

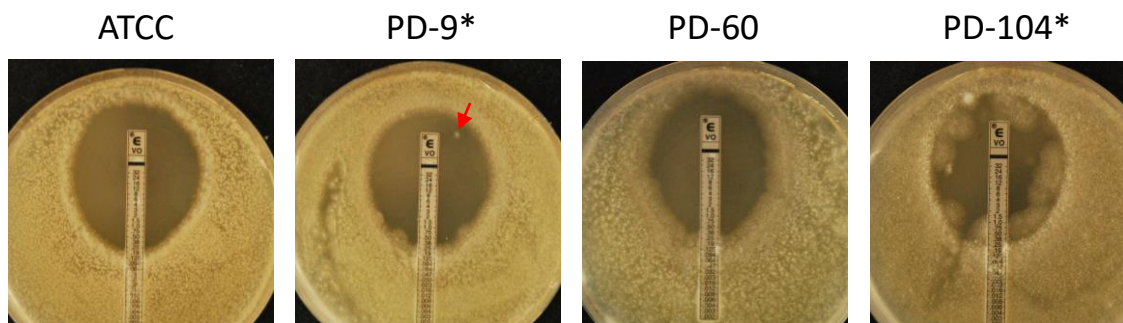

B

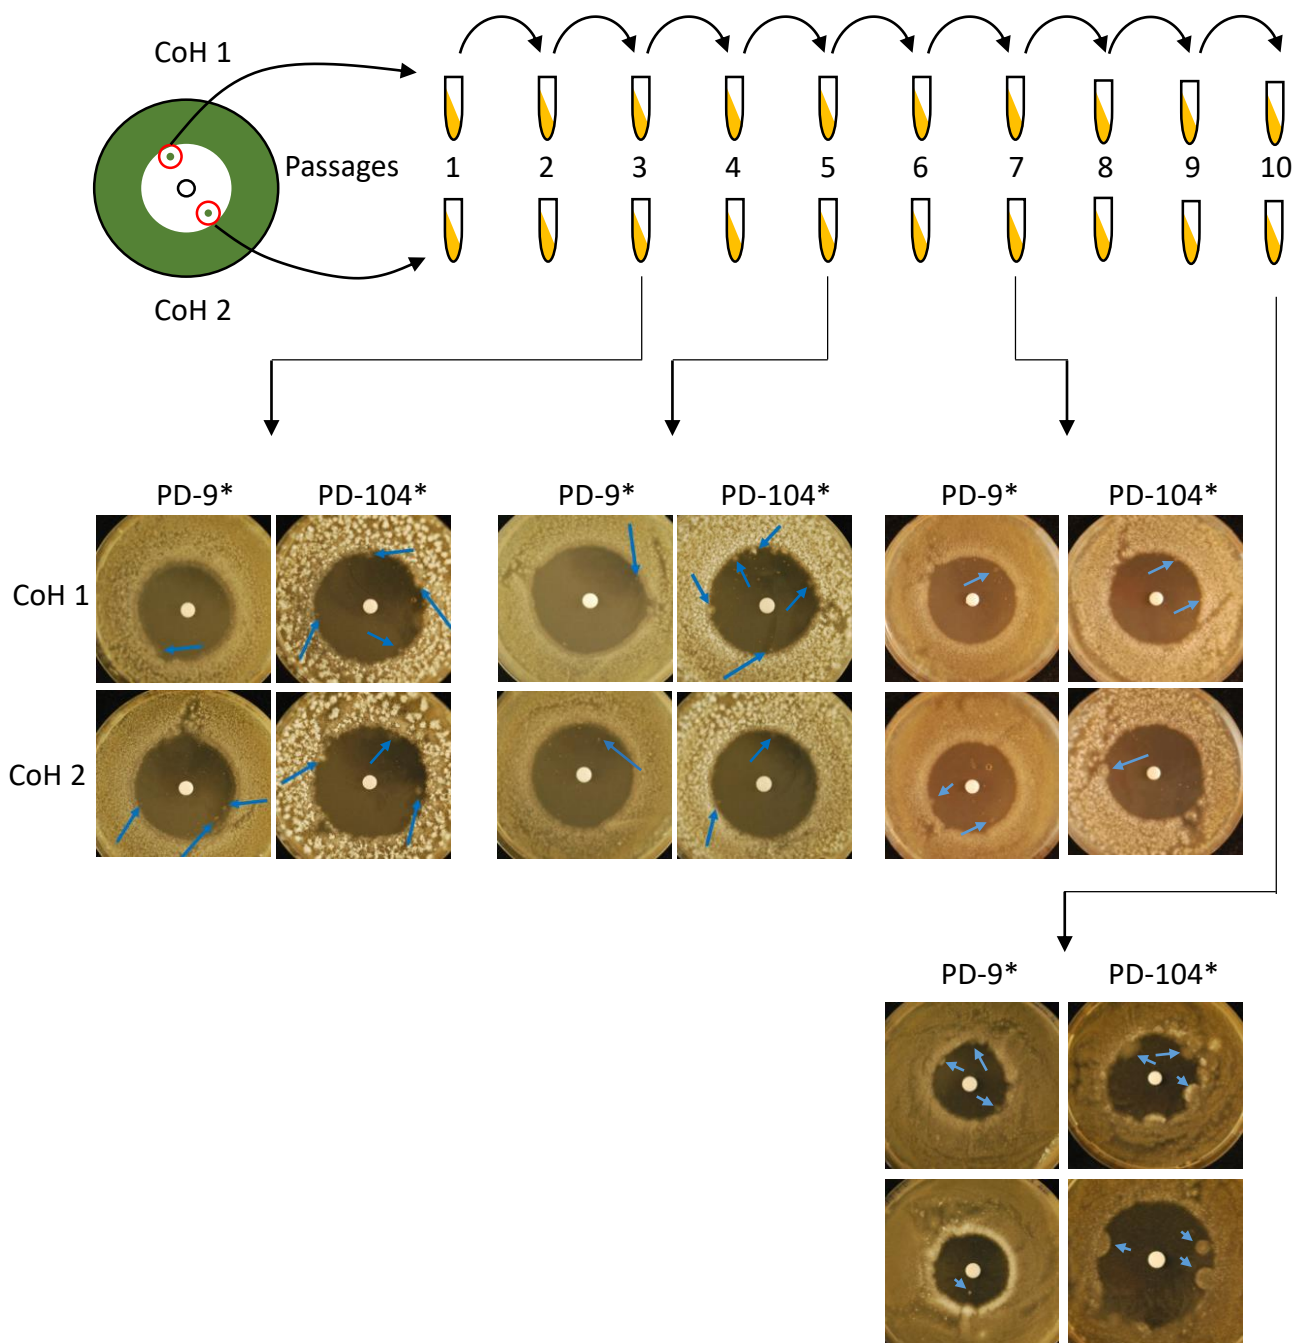

Fig. S3

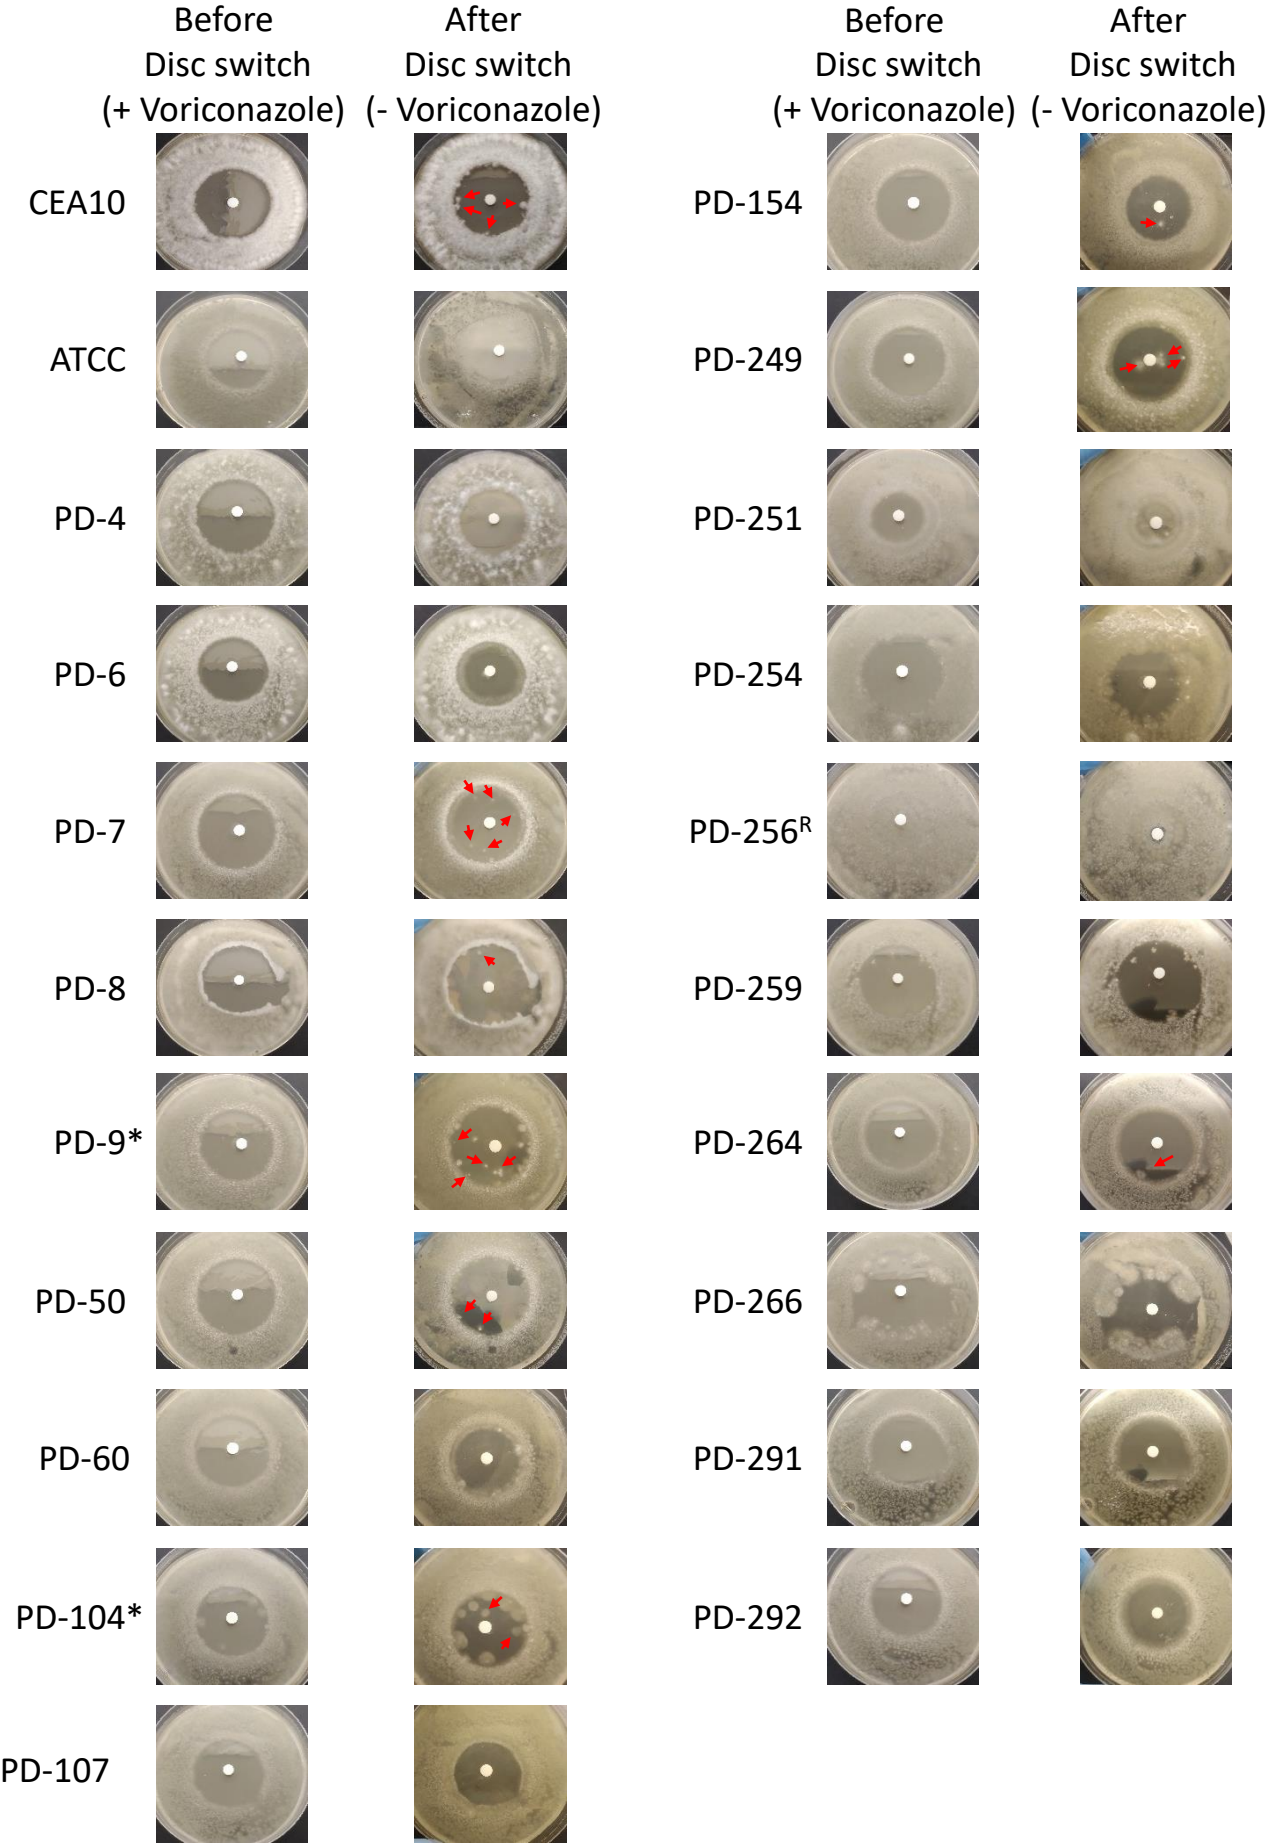

Fig. S4

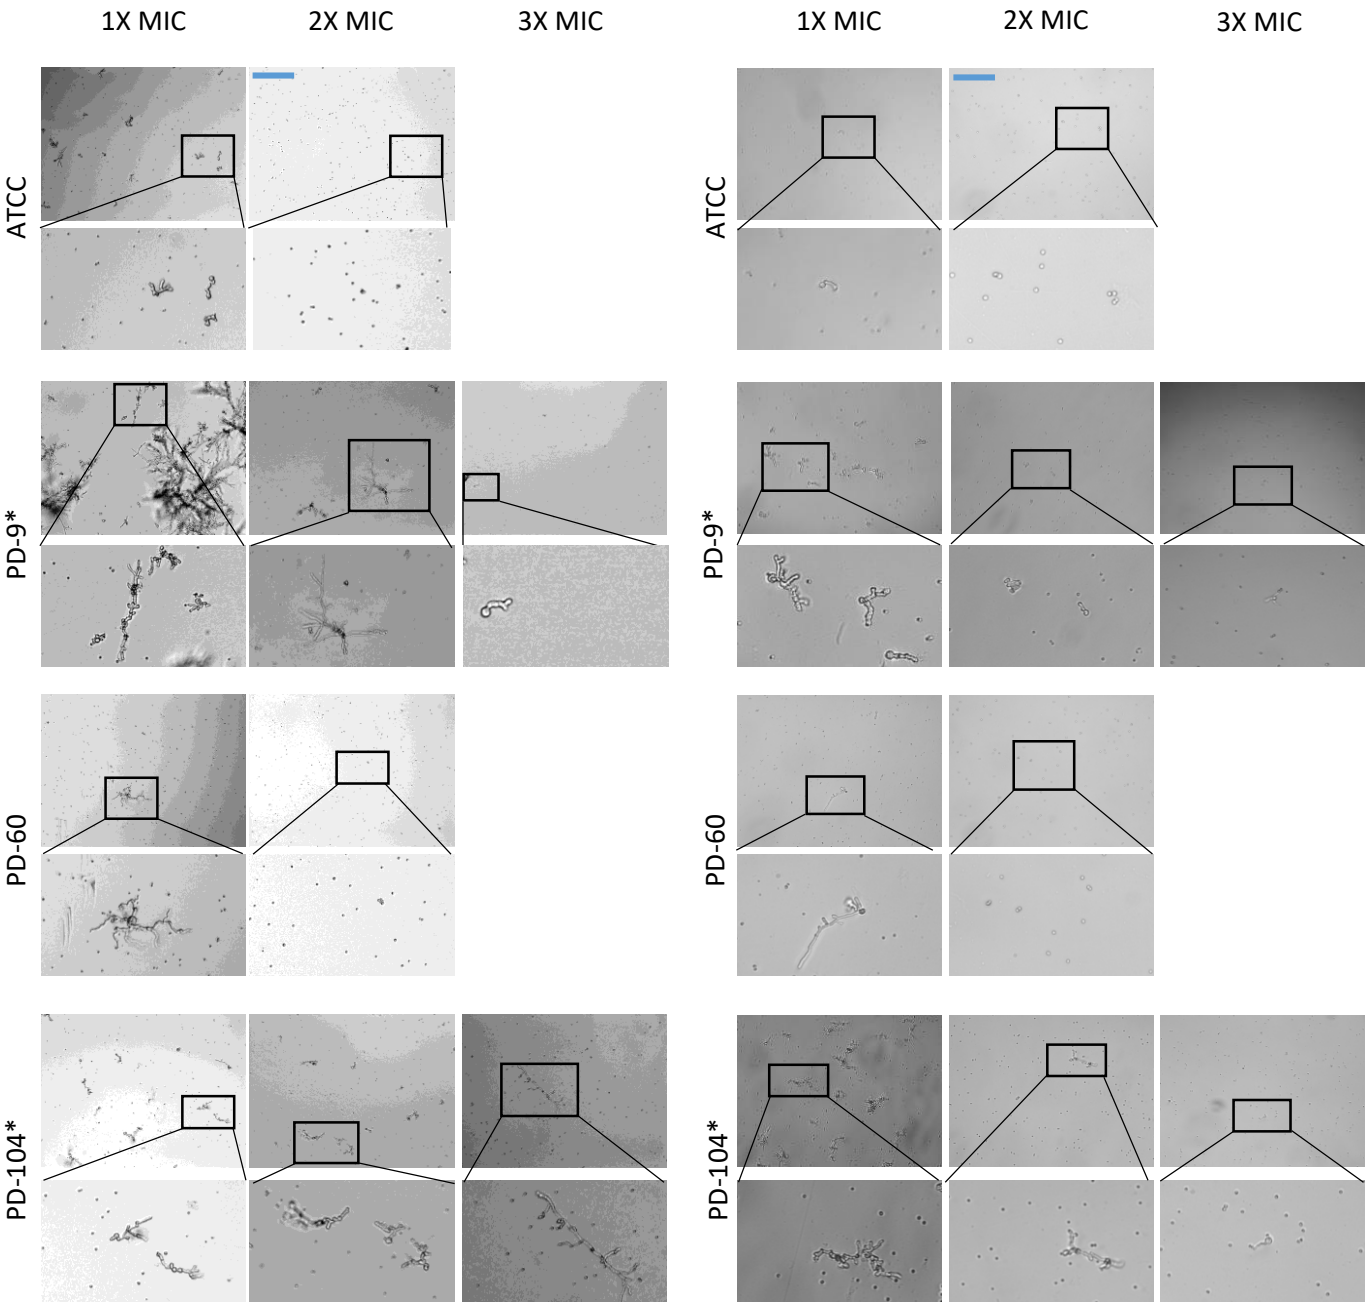

Fig. S5

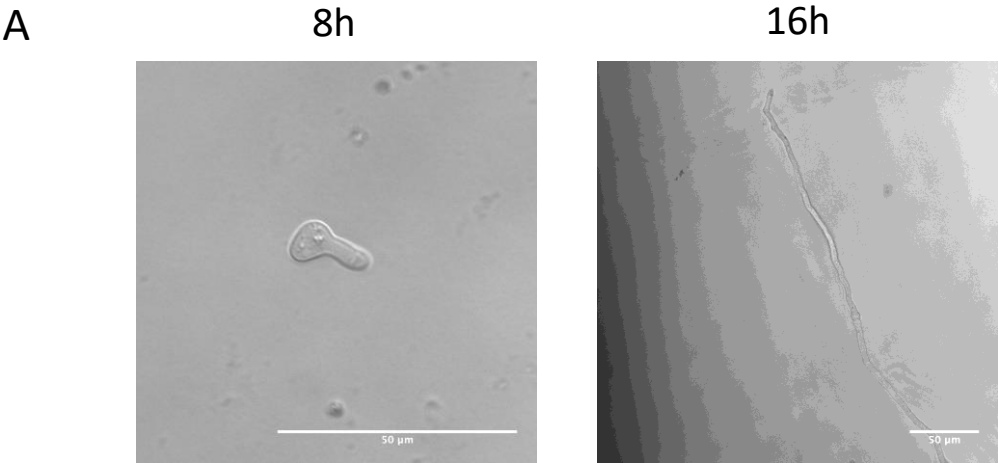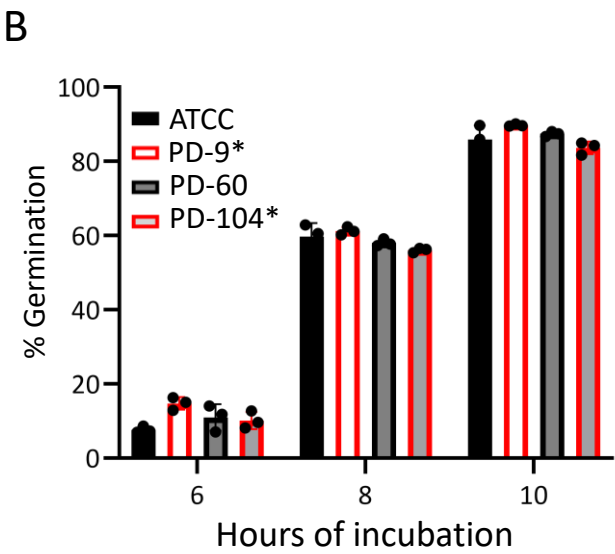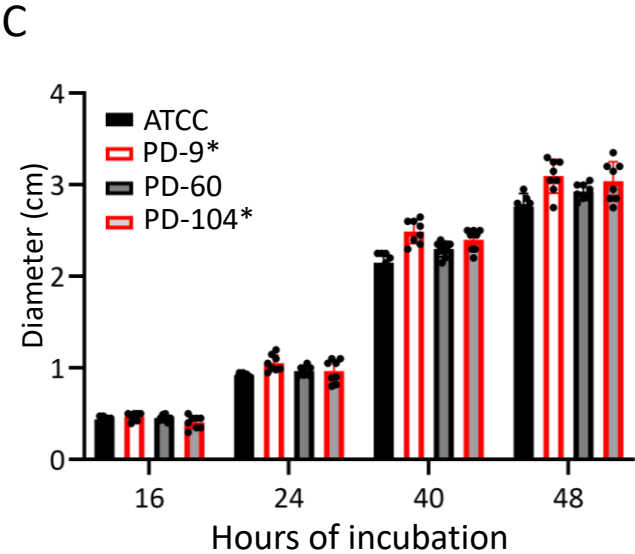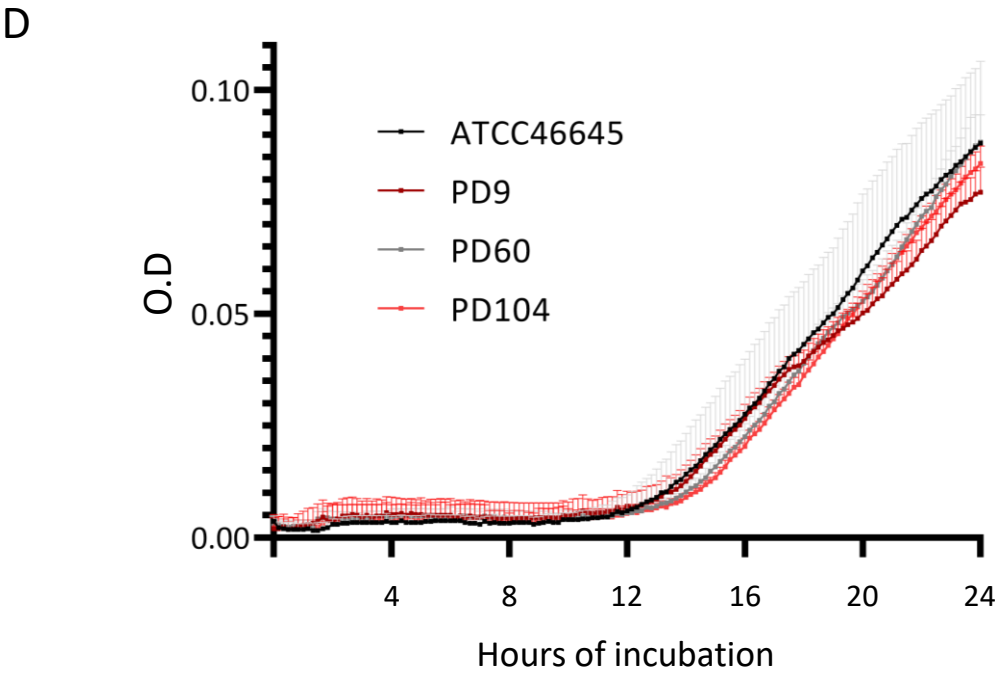

Fig. S6

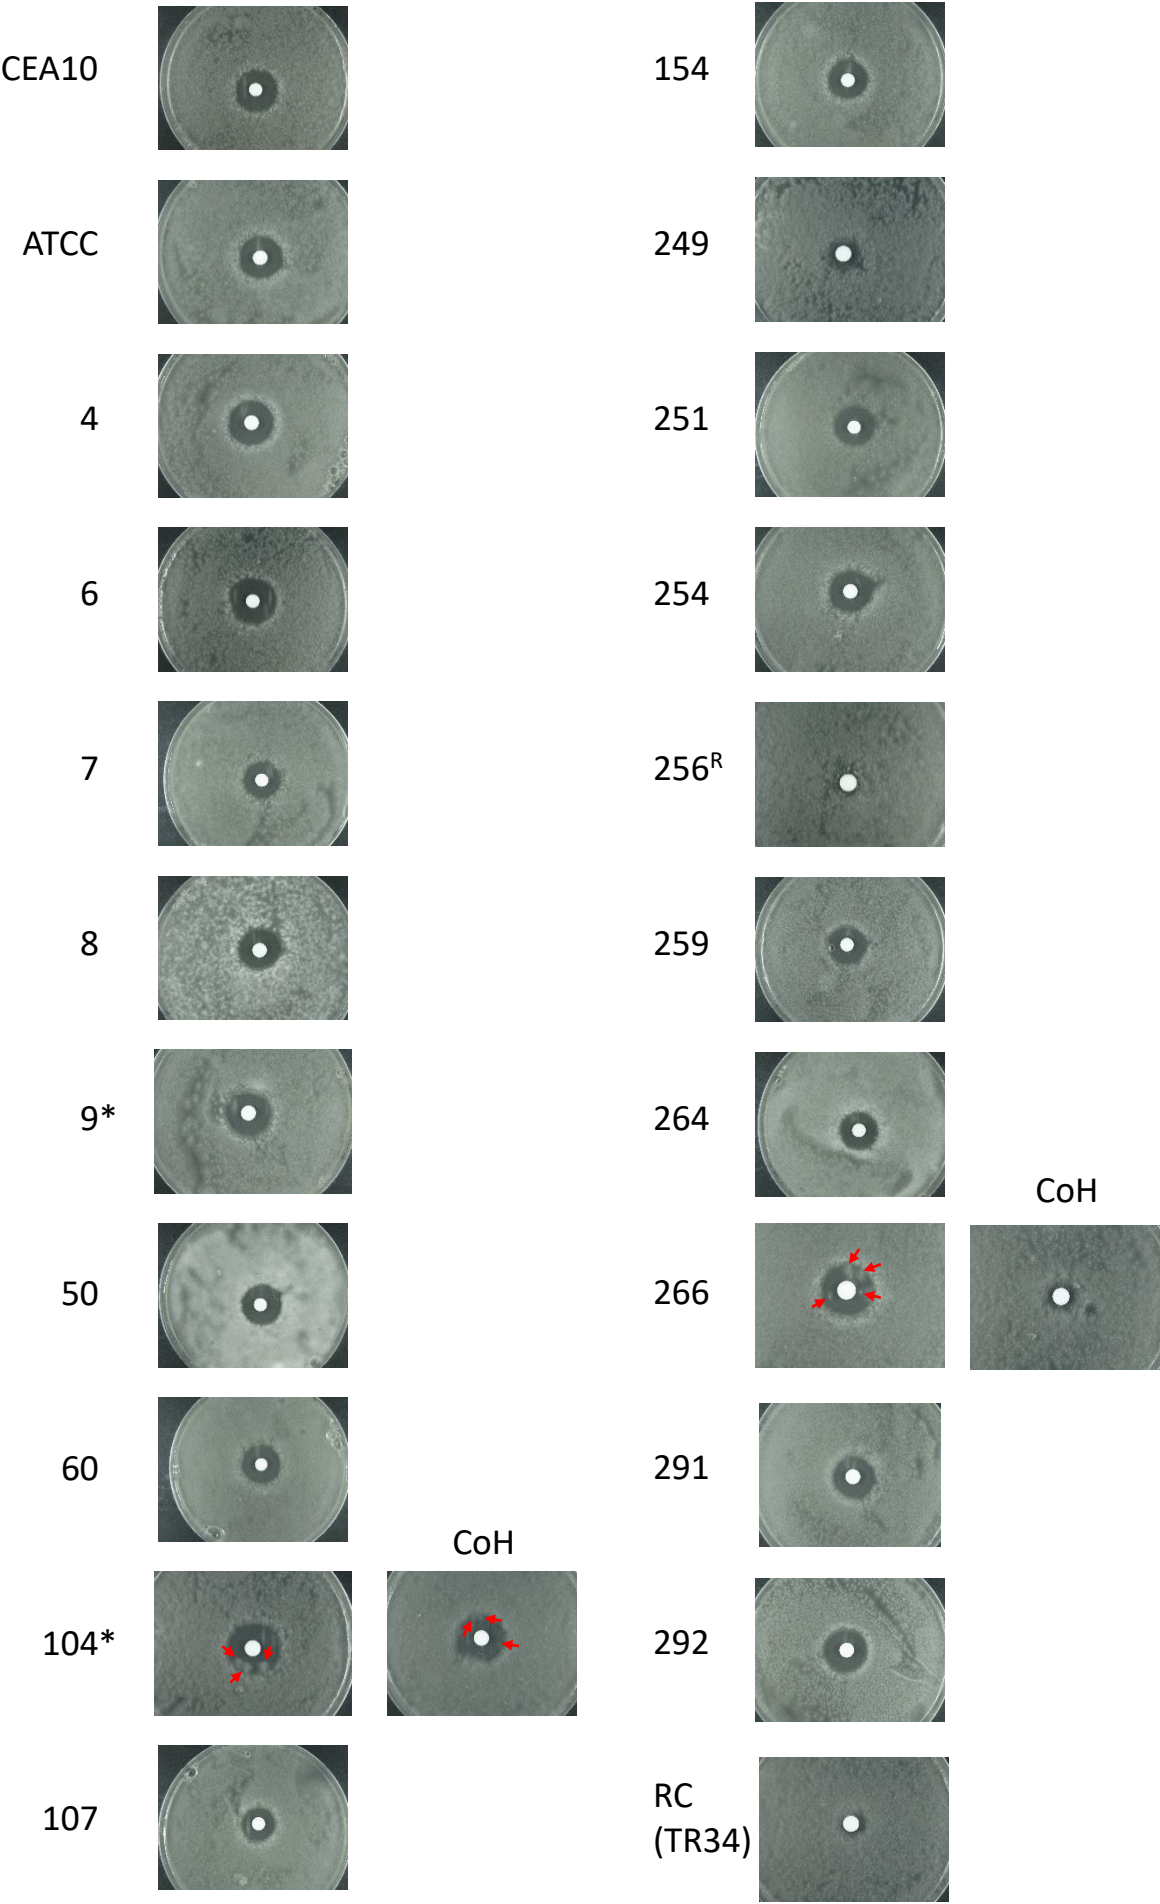

Fig. S7

A

| MIC    | Itraconazole<br>( $\mu\text{g/mL}$ ) | Isavuconazole<br>( $\mu\text{g/mL}$ ) |
|--------|--------------------------------------|---------------------------------------|
| ATCC   | 0.5                                  | 1                                     |
| PD9*   | 0.5                                  | 1                                     |
| PD60   | 0.5                                  | 1                                     |
| PD104* | 0.5                                  | 1                                     |

C

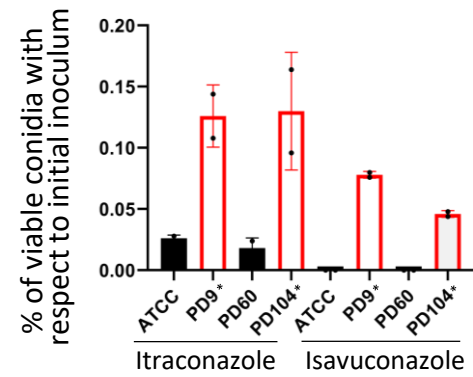

B

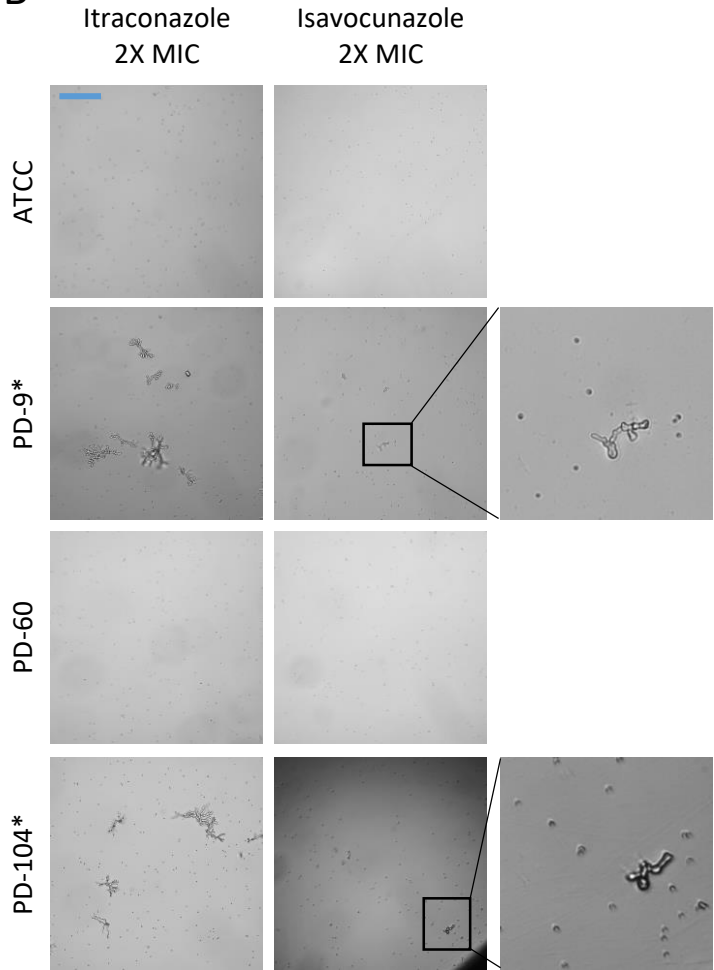

Fig. S8

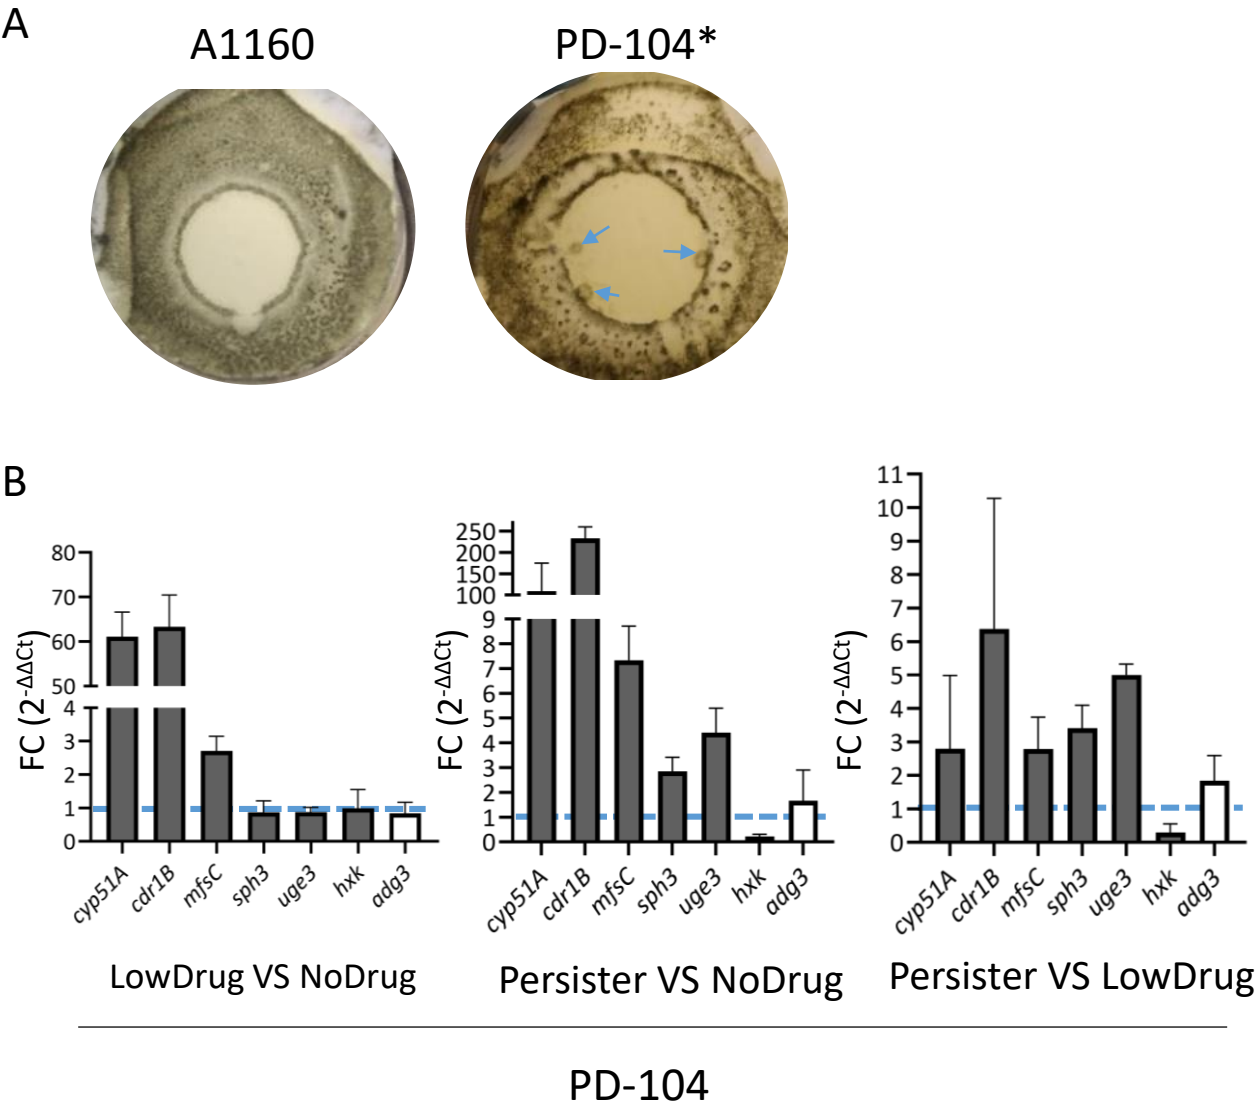

Fig. S9

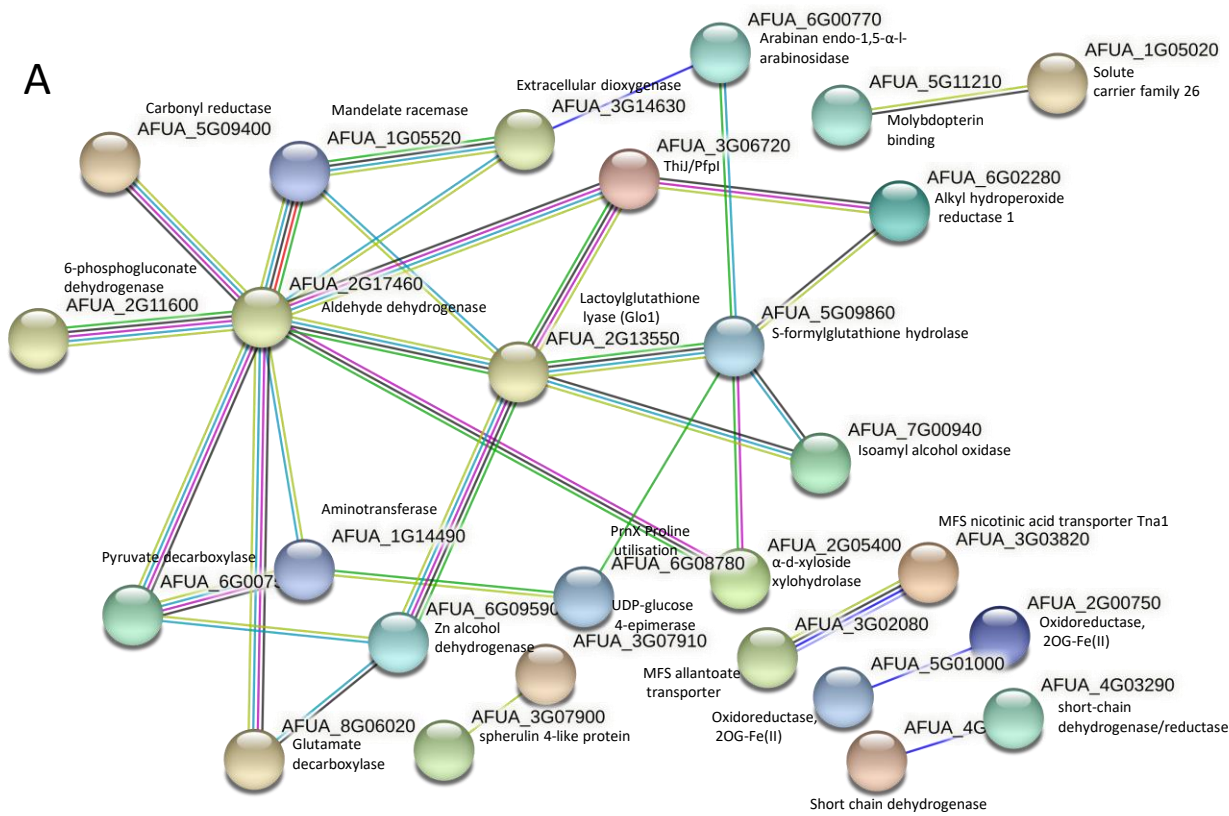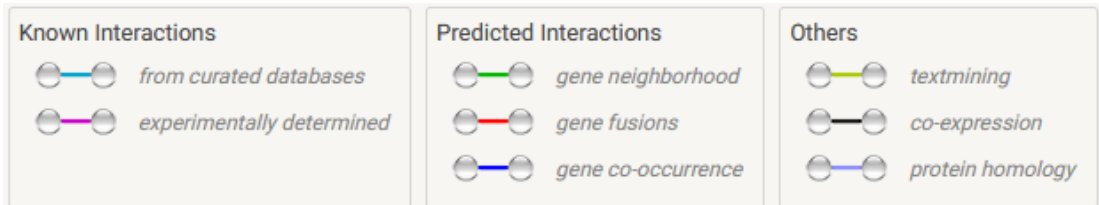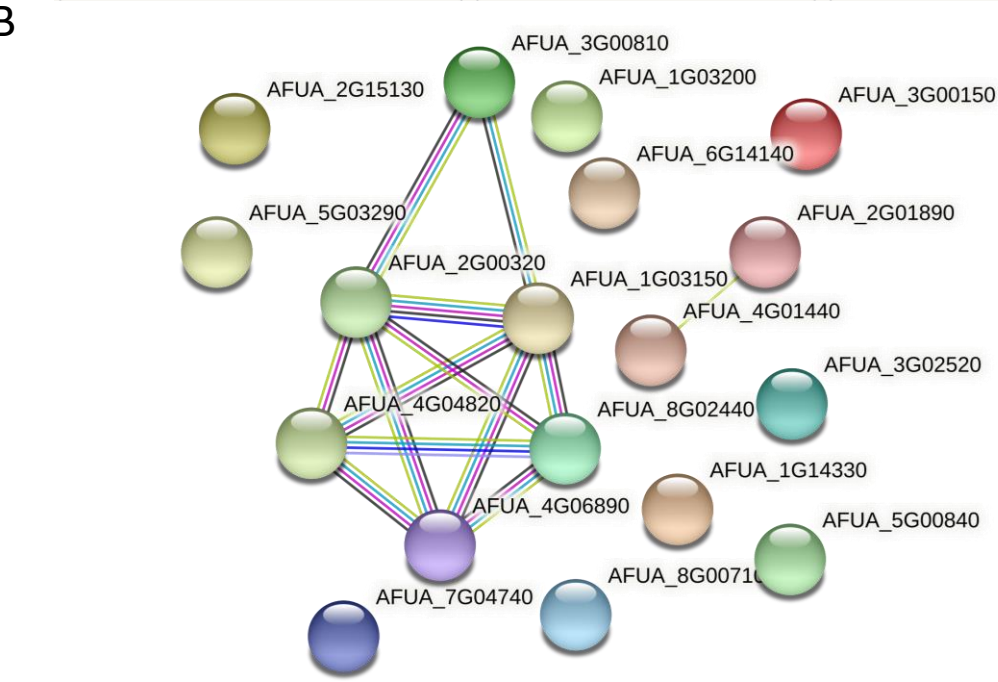

Fig. S10

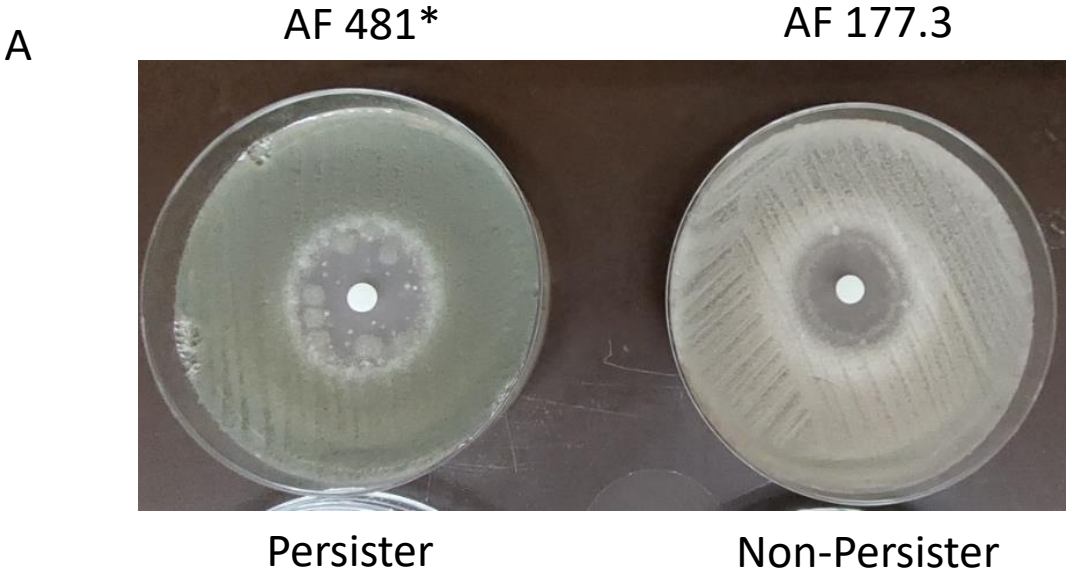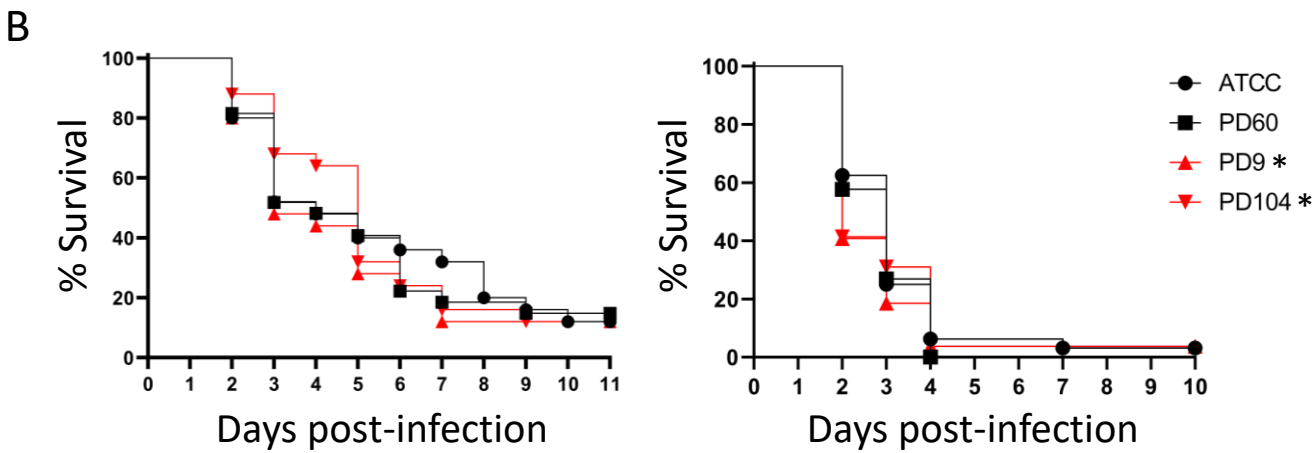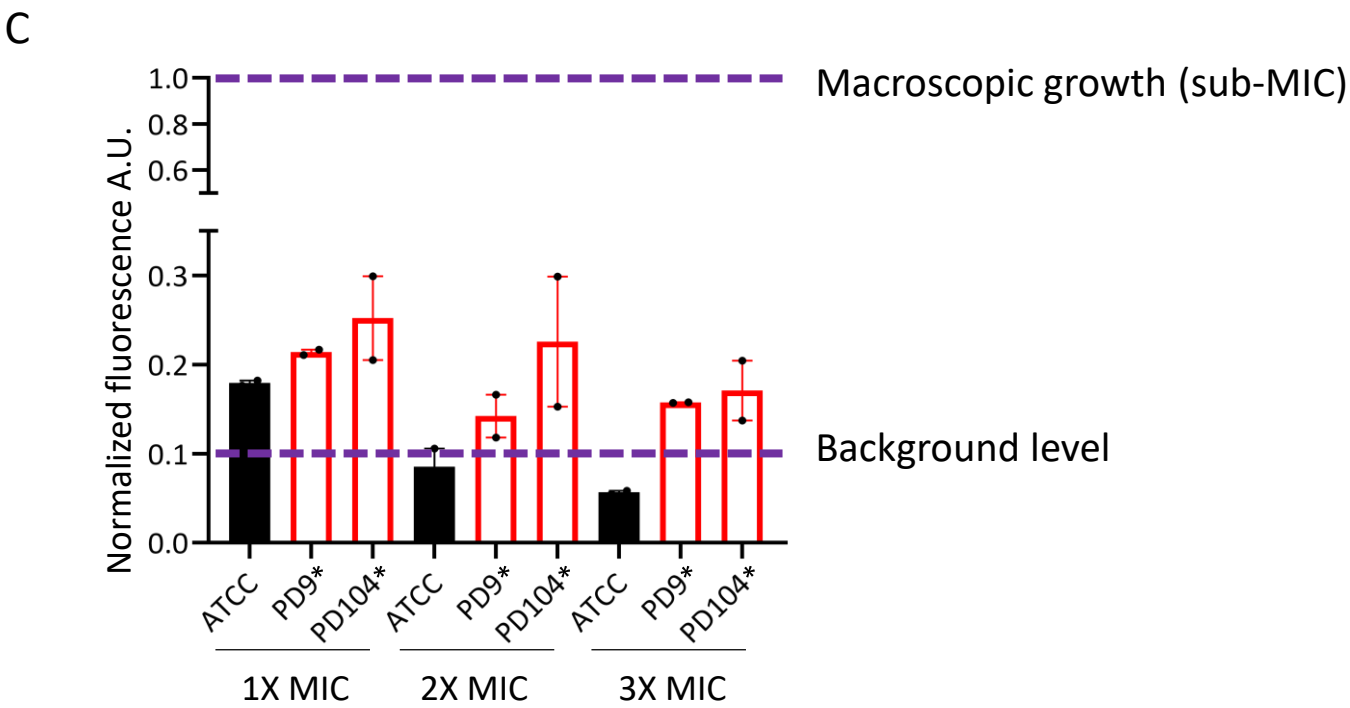

Supplement: Supplemental file 1 — Supplemental material. Download spectrum.04770-22-s0001.pdf, PDF file, 2.2 MB [file spectrum.04770-22-s0001.pdf]
